# Supplementary material for: Cyclosporin A inhibits prostate cancer growth through suppression of E2F8 transcription factor in a MELK‑dependent manner
Source: PubMed Central journal article supplement — Oncol Rep. 2023 Oct 25;50(6):218. doi: 10.3892/or.2023.8655 (PMC10636720; doi:10.3892/or.2023.8655), 2023-10-25

Appendix S1. Full scan images. Full scan images of (A) Fig. 3A, (B) Fig. 3B, (C) Fig. S6B, (D) Fig. 4C, (E) Fig. S7A and (F) Fig. S7D.

### A (Fig. 3A)

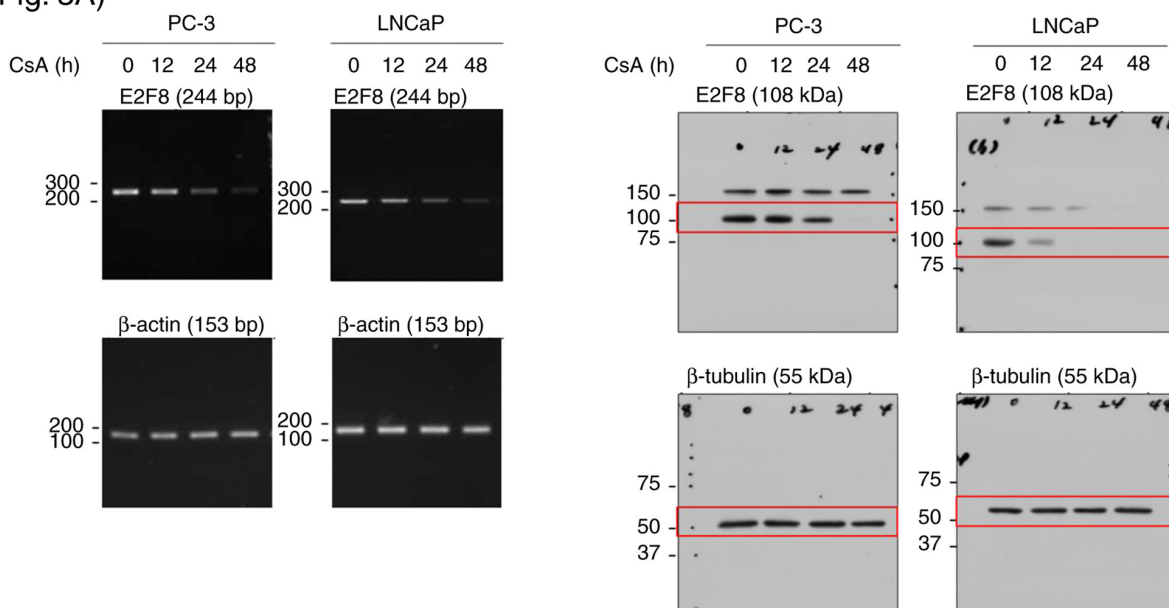

### B (Fig. 3B)

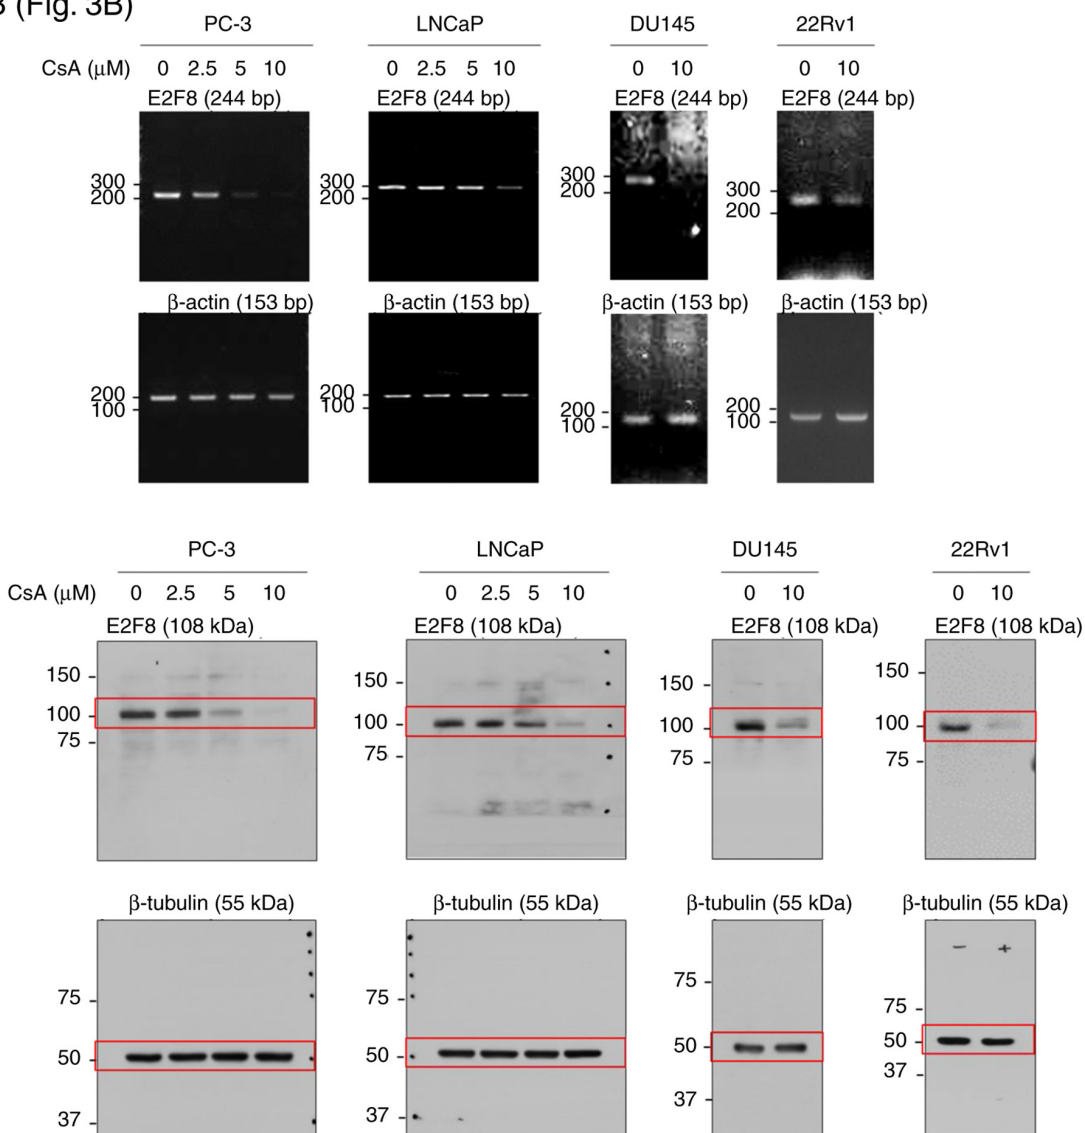

C (Fig. S6B)

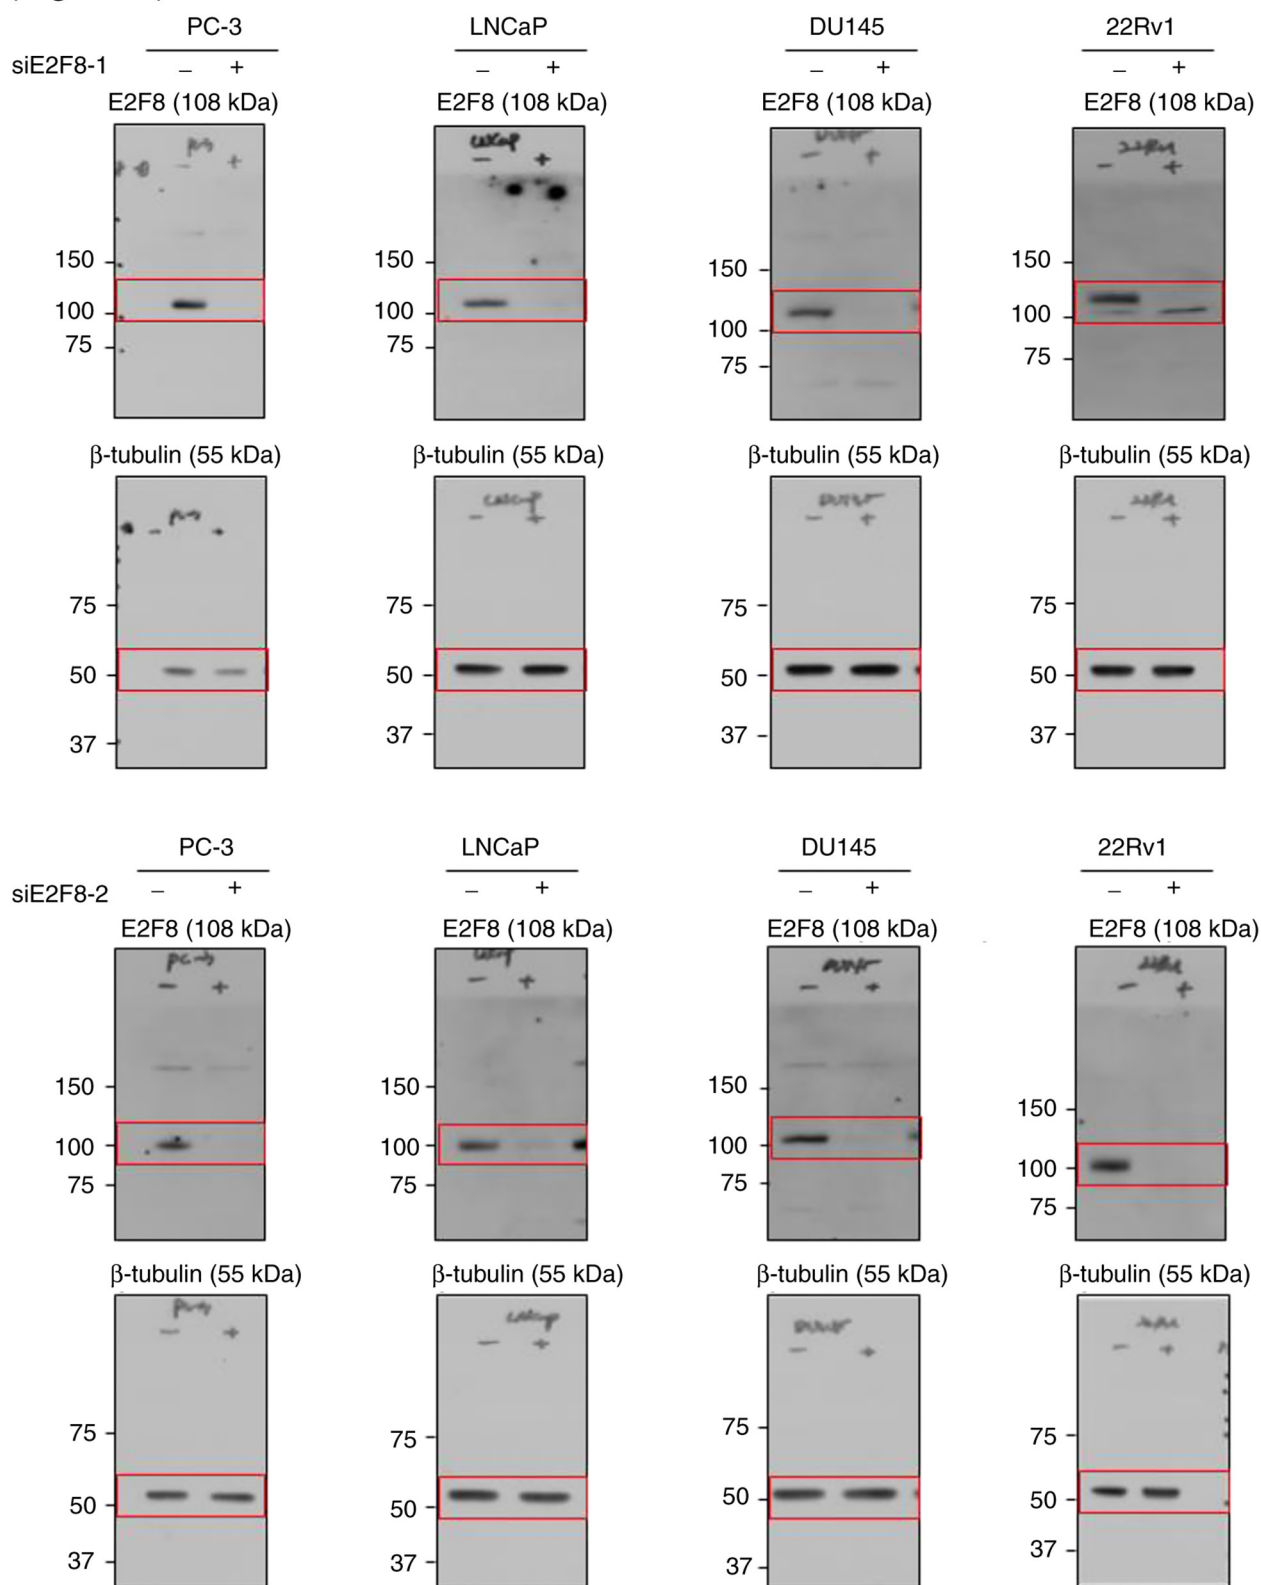

Appendix S1. Continued.

D (Fig. 4C)

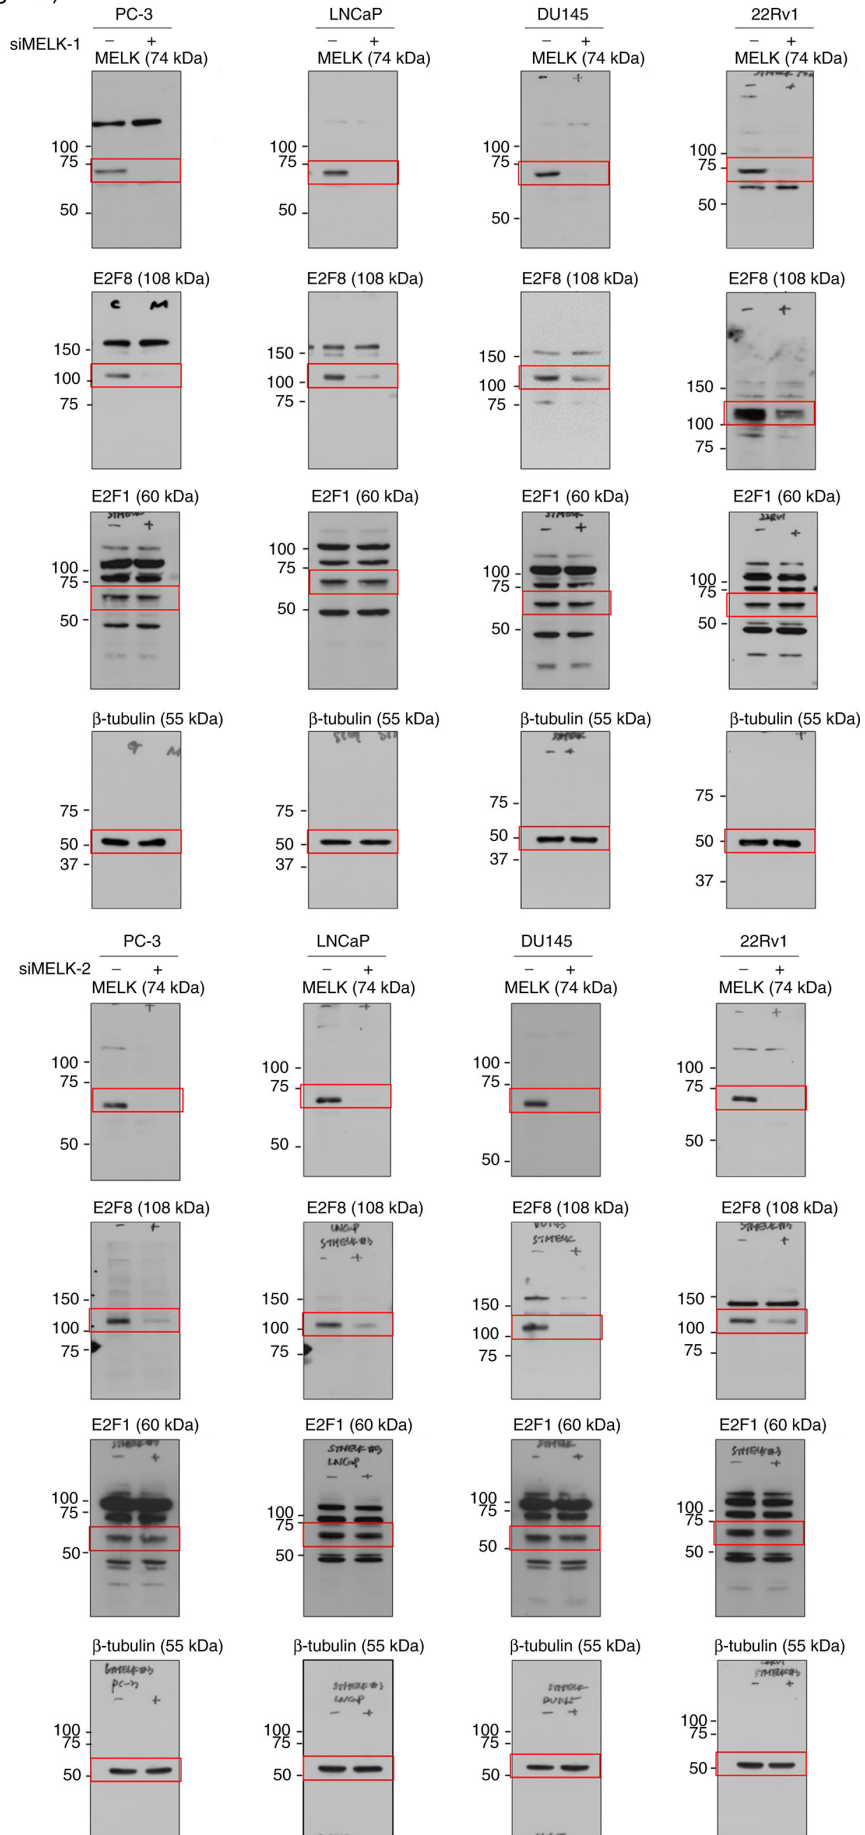

E (Fig. S7A)

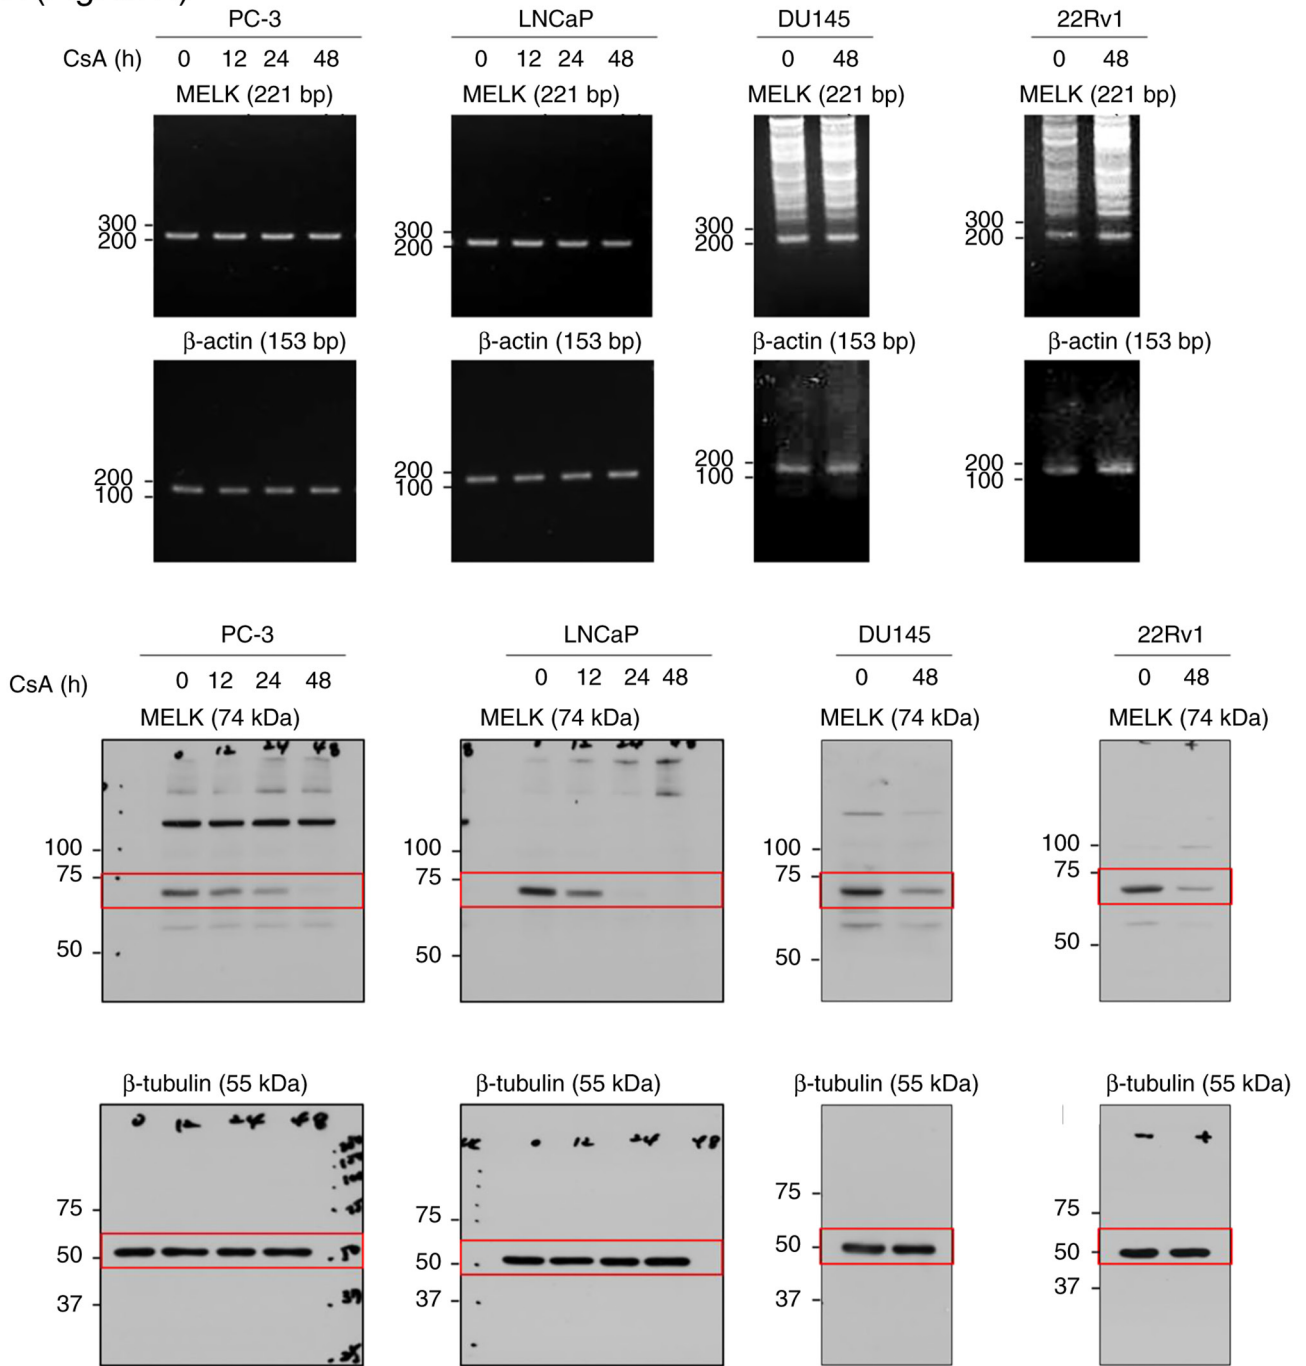

F (Fig. S7D)

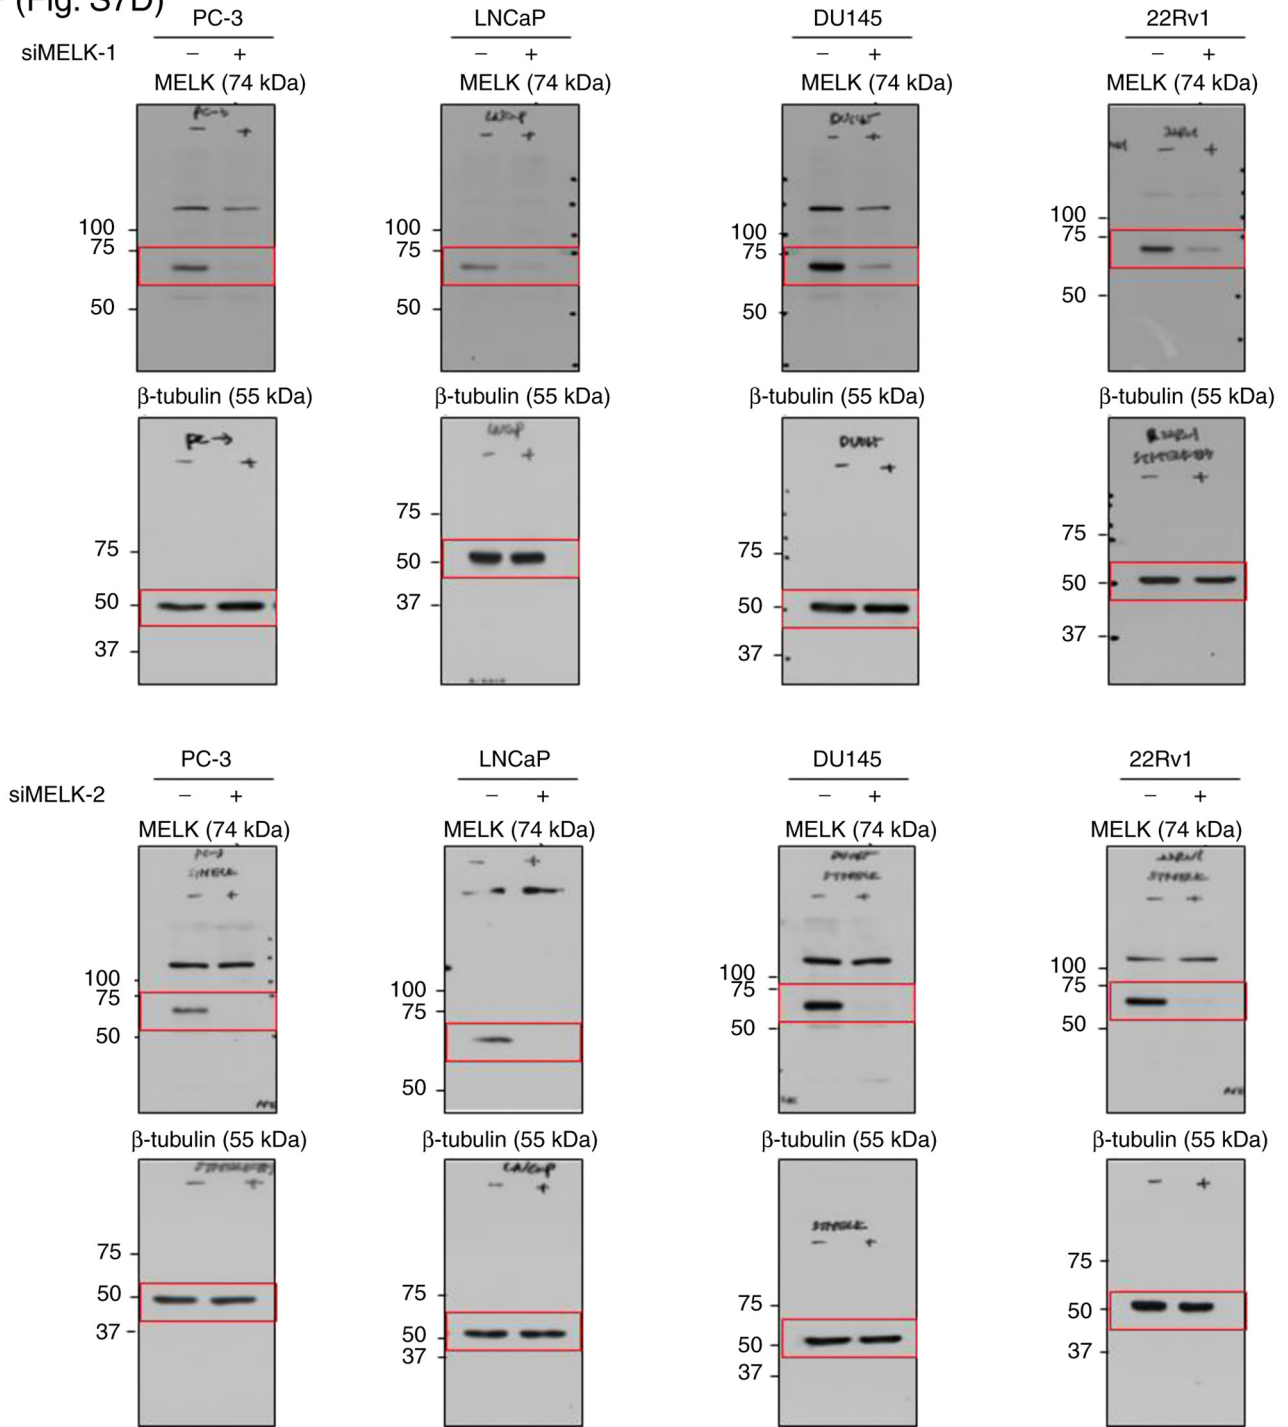

Supplement: Supplementary_Data3.pdf [file Supplementary_Data3.pdf]
