# Supplementary material for: Cyclosporin A inhibits prostate cancer growth through suppression of E2F8 transcription factor in a MELK‑dependent manner
Source: PubMed Central journal article supplement — Oncol Rep. 2023 Oct 25;50(6):218. doi: 10.3892/or.2023.8655 (PMC10636720; doi:10.3892/or.2023.8655), 2023-10-25
Supplement: Supplementary_Data4.pdf [file Supplementary_Data4.pdf]

Table SI.PCR primer sequences.

| Target         | Sequence (5' – 3')                                      |
|----------------|---------------------------------------------------------|
| E2F8           | F:GCAGCCAATGATACCTCAAAGG<br>R: ATGAGCACTGCGTGAGAGGGATTA |
| MELK           | F:GCTGCAAGGTATAATTGATGGA<br>R:CAGTAACATAATGACAGATGGGC   |
| $\beta$ -actin | F: TTAGTTGCGTTACACCCTTTC<br>R: GTCACCTTCACCGTTCCAGTT    |
| 18s            | F:CTTAGAGGGACAAGTGGCG<br>R:GGACATCTAAGGGCATCACA         |

Table SII.siRNA sequences.

| Target    | Sequence (5' – 3')                                               |
|-----------|------------------------------------------------------------------|
| siControl | F: GCAAGCUGACCCUGAAGUUCAU<br>R: GAACUUCAGGGUCAGCUUGCCG           |
| siMELK-1  | F: CCAUGUGCUAGAGACAGCCAACAAAUU<br>R: UUUGUUGGCUGUCUCUAGCACAUGGUU |
| siMELK-2  | F: GGAUCAUGCAAGAUUACAACUUU<br>R: AGUUGUAAUCUUGCAUGAUCCUU         |
| siE2F8-1  | F: GGCCAAAGACUGUAUACACUU<br>R: GUGUAUACAGUCUUUGGCCUU             |
| siE2F8-2  | F: GGAUUAUUGUGUCAUAAGUUU<br>R: ACUUAUGACACAAUAAUCCUU             |

si, short interfering.
